# Supplementary material for: Transcriptome meta-analysis reveals a dysregulation in extra cellular matrix and cell junction associated gene signatures during Dengue virus infection
Source: PubMed Central journal article supplement (PMC5030657; doi:10.1038/srep33752), 2016-09-21
Supplement: srep33752-s1.pdf [file srep33752-s1.pdf]

## Supplementary Information

### **Transcriptome meta-analysis reveals a dysregulation in extra cellular matrix and cell-junction associated gene signatures during Dengue virus infection.**

Sumbul Afroz<sup>1,+</sup>, Jeevan Giddaluru<sup>1,+</sup>, Mohd. Manzar Abbas<sup>1</sup>, and Nooruddin Khan<sup>1,\*</sup>

*<sup>1</sup>School of lifesciences, Department of Biotechnology and Bioinformatics, University of Hyderabad, Hyderabad-500046, Telangana, India.*

**\*Correspondence should be addressed to** : Nooruddin Khan (noor@uohyd.ac.in).

<sup>+</sup>these authors have contributed equally to this work.

### Top Biological process involved in Dengue infection

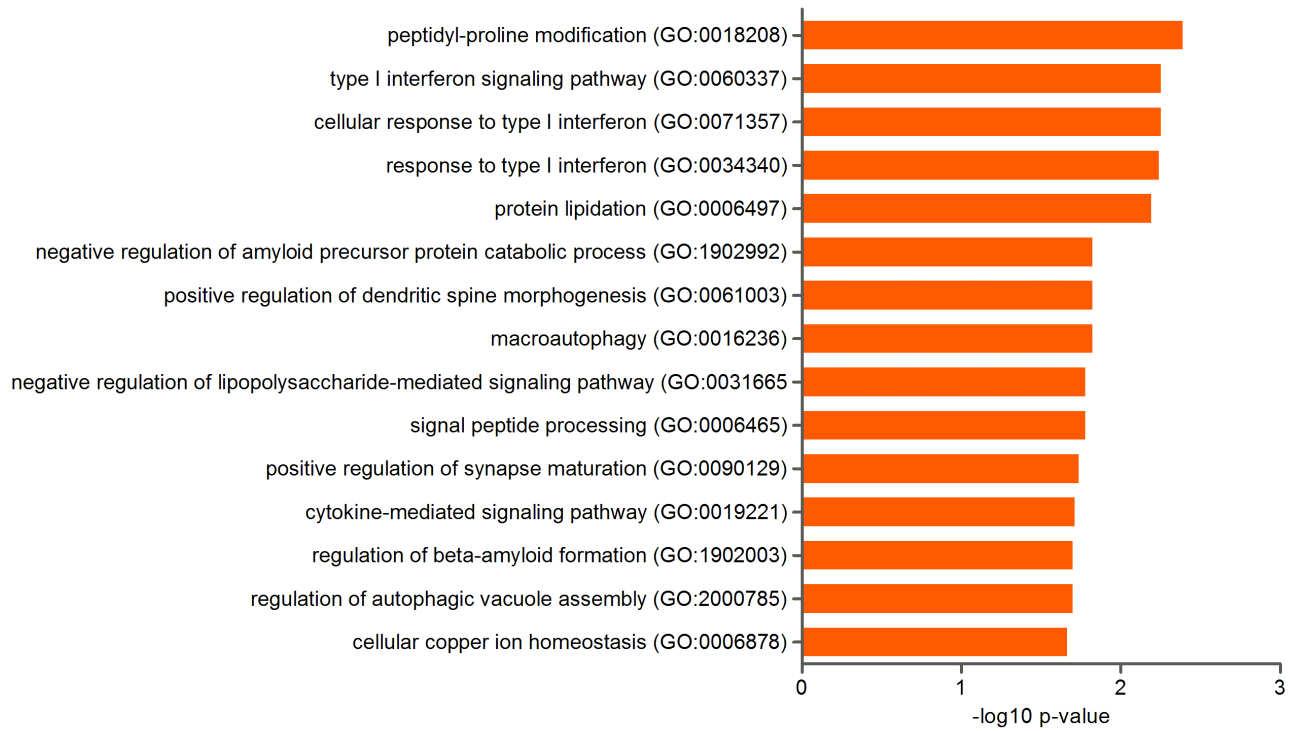

**Supplementary Figure S1. Top GO biological process enriched from the set of meta-genes.**

### Top Molecular functions involved in Dengue infection

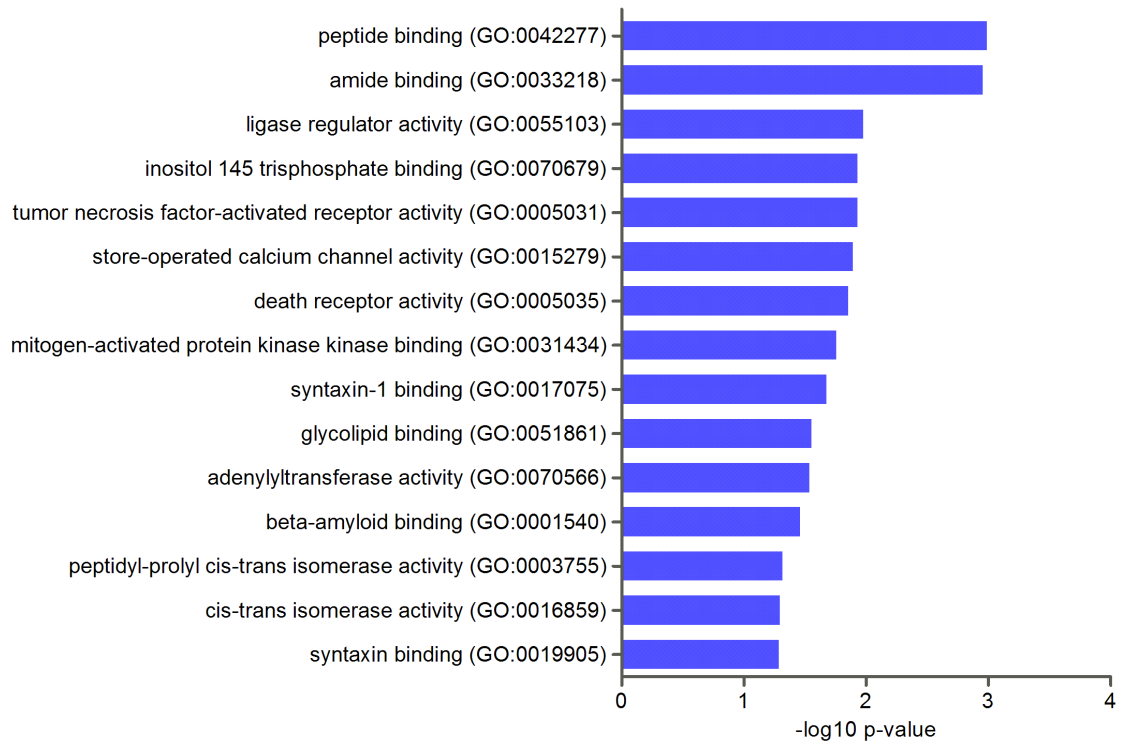

**Supplementary Figure S2. Top molecular functions enriched from the set of meta-genes.**

### Top pathways involved in Dengue infection

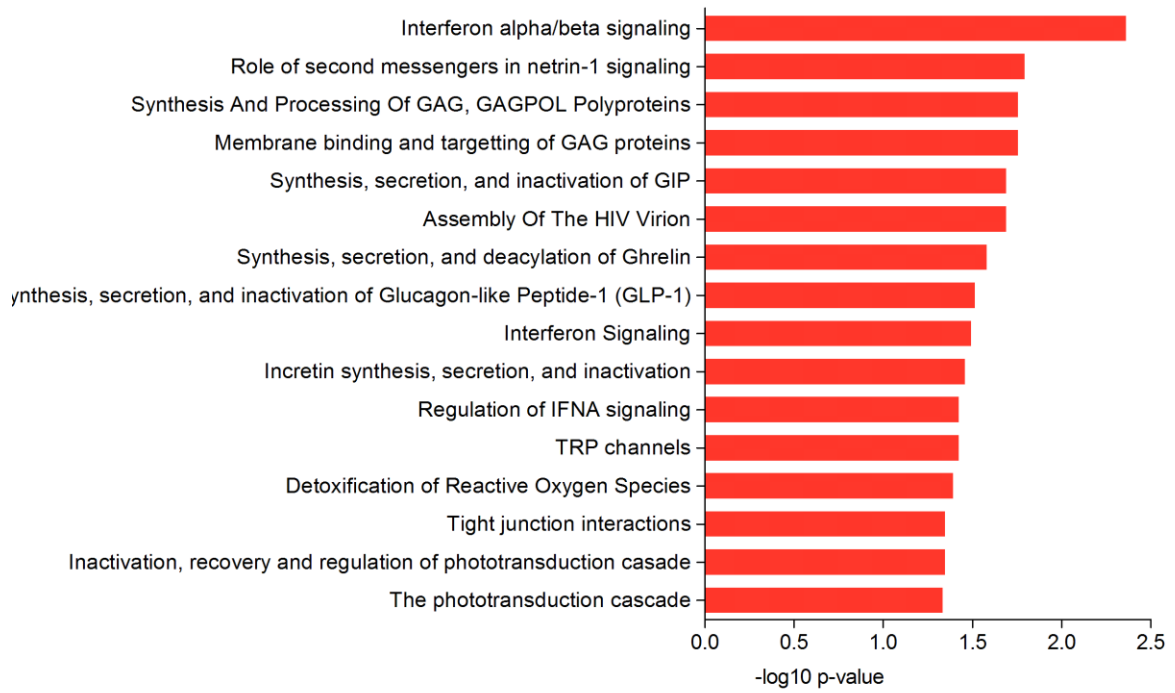

**Supplementary Figure S3. Top pathways enriched in Reactome pathway database.**

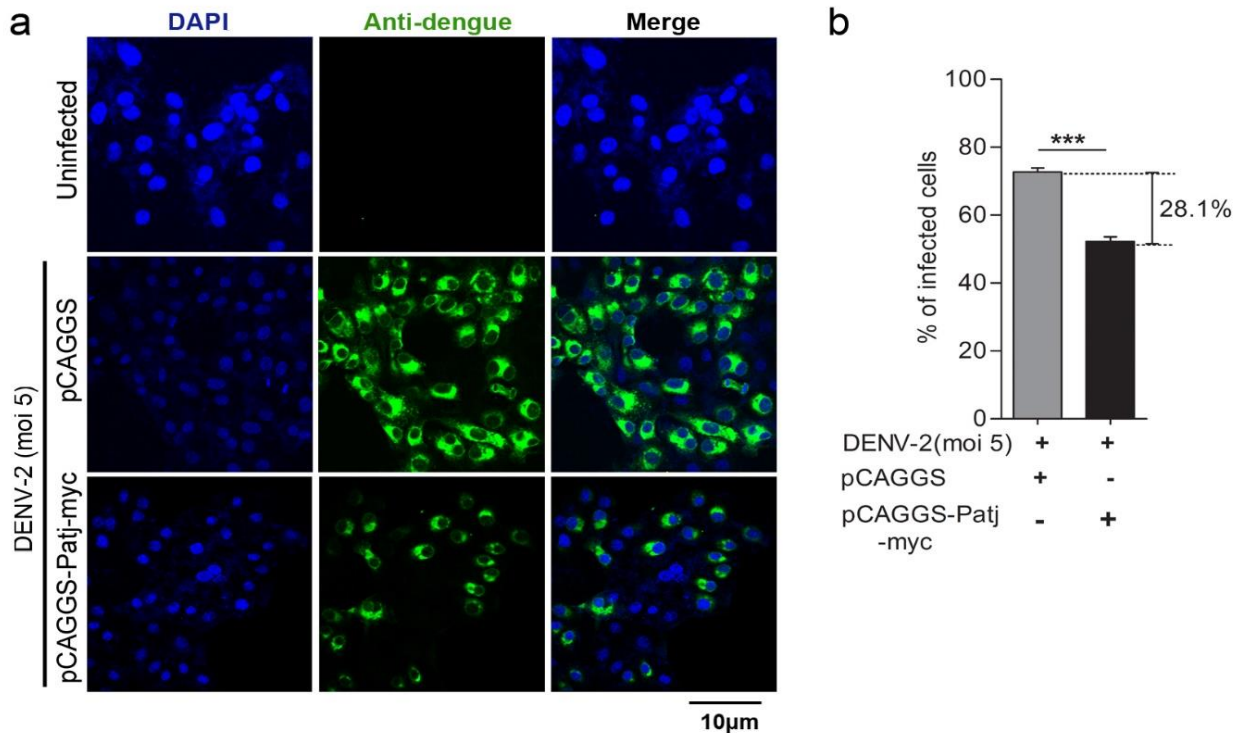

**Supplementary Figure S4. PATJ overexpression interferes with DENV-2 infection. a)**

Laser scanning confocal microscopy to visualize the no. of DENV-1 infected Vero cells transfected with either pCAGGS (vector control) or pCAGGS-Patj-myc. Vero cells were transfected with equal concentrations of both the plasmids for 36 hours followed by infection of DENV-2 (moi 5) for another 18hrs. Following incubation the cells were fixed, permeabilized, and stained with anti-Dengue monoclonal Ab (green). b) Quantification of number of DENV-2 infected cells in vector transfected and pCAGGS-Patj-myc transfected Vero cells. Infected cells were counted in at least ten different fields for each experimental condition using Image J software and average number of infected cells per field were plotted. Statistical analysis was performed using Student's t-test using Graph Pad Prism version 5 (Graph Pad Software Inc., San Diego, CA.). Error bars represent the standard error of the mean (SEM). \*\*\*P<0.001, \*\*P<0.01, \*P<0.05 were considered statistically significant

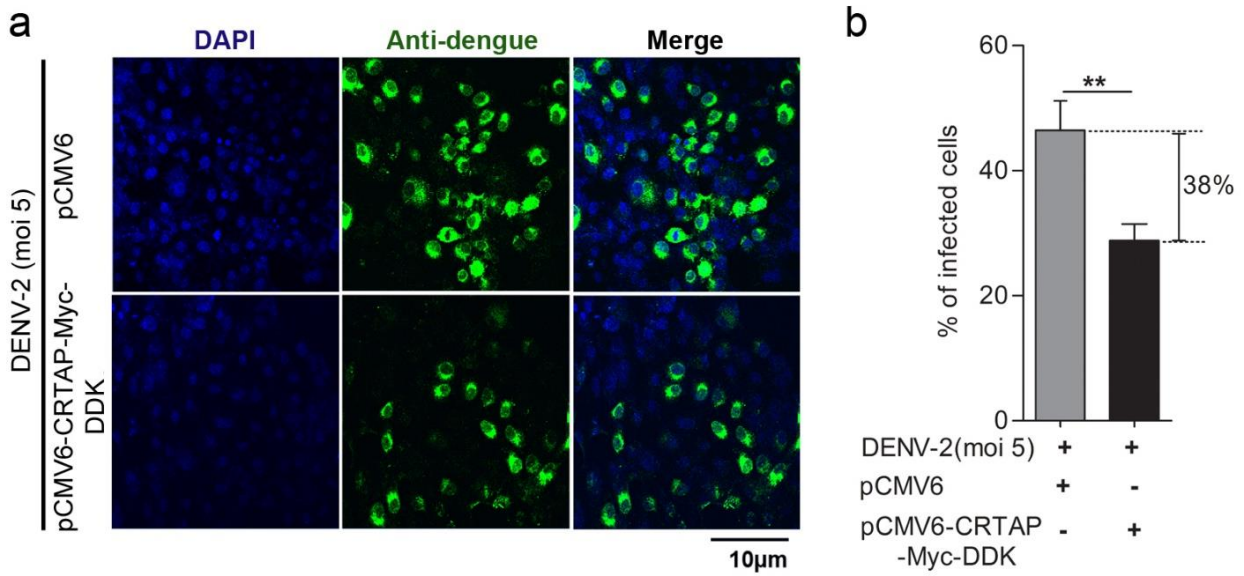

**Supplementary Figure S5. Over-expression of CRTAP gene inversely regulates**

**DENV-2 infection.** a) Laser scanning confocal microscopy to visualize the number of DENV-2 (moi 5) infected Vero cells transfected with either pCMV6 (vector control) or pCMV6-CRTAP-Myc-DDK. Following incubation the cells were fixed, permeabilized, and stained with anti-Dengue monoclonal Ab (green). b) Quantification of number of DENV-2 infected cells in vector transfected and pCMV6-CRTAP-Myc-DDK transfected Vero cells. Infected cells were counted as mentioned in previous figure. Statistical analysis was performed using Student's t-test using Graph Pad Prism version 5 (Graph Pad Software Inc., San Diego, CA.). Error bars represent the standard error of the mean (SEM).

\*\*\*P<0.001, \*\*P<0.01, \*P<0.05 were considered statistically significant.

**Supplementary Table S1. Datasets and samples information.**

| Custom Dataset ID | GEO Accession ID |          | Disease Grade | No. of samples |         | References                                                        |
|-------------------|------------------|----------|---------------|----------------|---------|-------------------------------------------------------------------|
|                   | Diseased         | Healthy  |               | Diseased       | Healthy |                                                                   |
| 1                 | GSE43777         | GSE18090 | DF            | 25             | 8       | (Sun, García et al. 2013)<br>(Nascimento, Braga-Neto et al. 2009) |
| 2                 |                  |          | DHF           | 24             | 8       |                                                                   |
| 3                 | GSE51808         | GSE51808 | DF            | 18             | 9       | (Marcin, Nakaya et al. 2014)                                      |
| 4                 |                  |          | DHF           | 10             | 9       |                                                                   |
| 5                 | GSE17924         | GSE17924 | DF            | 16             | 52      | (Devignot, Sapet et al. 2010)                                     |
| 6                 |                  |          | DHF           | 32             | 52      |                                                                   |
| 7                 | GSE16463         | GSE16463 | DF            | 7              | 2       | (Tantibhedhyangkul, Prachason et al. 2011)                        |

**Supplementary Table S2. Meta-genes combined p-values and log fold change values.**

| <b>Rank</b> | <b>Log Fold Score</b> | <b>Combined p-value (Weighted Z method)</b> | <b>Gene Symbol</b> | <b>Gene Name</b>                                                                      |
|-------------|-----------------------|---------------------------------------------|--------------------|---------------------------------------------------------------------------------------|
| 1           | 1.9169512             | 3.59E-29                                    | CAPRIN1            | cell cycle associated protein 1                                                       |
| 2           | 1.750237              | 2.09E-18                                    | RRBP1              | ribosome binding protein 1                                                            |
| 3           | 1.6626014             | 1.68E-15                                    | RTP4               | receptor (chemosensory) transporter protein 4                                         |
| 4           | 1.4829478             | 1.68E-20                                    | USP18              | ubiquitin specific peptidase 18                                                       |
| 5           | 1.4616151             | 3.48E-15                                    | OAS2               | "2-5-oligoadenylate synthetase 2, 69/71kDa"                                           |
| 6           | 1.3819559             | 1.18E-22                                    | SPCS3              | signal peptidase complex subunit 3 homolog (S. cerevisiae)                            |
| 7           | 1.1588407             | 1.41E-19                                    | ATOX1              | antioxidant 1 copper chaperone                                                        |
| 8           | 1.1382786             | 4.04E-17                                    | CKAP4              | cytoskeleton-associated protein 4                                                     |
| 9           | 1.0105375             | 1.06E-23                                    | CMC2               | C-x(9)-C motif containing 2                                                           |
| 10          | 0.44321185            | 2.16E-15                                    | TRIB1              | tribbles pseudokinase 1                                                               |
| 11          | -0.38338634           | 4.90E-15                                    | SPNS3              | spinster homolog 3 (Drosophila)                                                       |
| 12          | -0.39823732           | 2.05E-19                                    | CTDSP2             | "CTD (carboxy-terminal domain, RNA polymerase II, polypeptide A) small phosphatase 2" |
| 13          | -0.4850007            | 8.53E-16                                    | OLFM1              | olfactomedin 1                                                                        |
| 14          | -0.52593106           | 8.81E-21                                    | KIAA1324           | KIAA1324                                                                              |
| 15          | -0.54209703           | 9.03E-18                                    | TGOLN2             | trans-golgi network protein 2                                                         |
| 16          | -0.5644709            | 5.19E-15                                    | VENTX              | VENT homeobox                                                                         |
| 17          | -0.6471077            | 1.04E-17                                    | NMT2               | N-myristoyltransferase 2                                                              |
| 18          | -0.6885388            | 2.60E-16                                    | LPHN1              | latrophilin 1                                                                         |
| 19          | -0.7059765            | 1.12E-20                                    | ZNF395             | zinc finger protein 395                                                               |
| 20          | -0.77331513           | 6.26E-19                                    | TRPC1              | "transient receptor potential cation channel, subfamily C, member 1"                  |
| 21          | -0.7881717            | 2.01E-16                                    | CD1C               | CD1c molecule                                                                         |
| 22          | -0.8807664            | 2.03E-22                                    | RALGPS1            | Ral GEF with PH domain and SH3 binding motif 1                                        |
| 23          | -0.90612346           | 1.08E-16                                    | TNFRSF25           | "tumor necrosis factor receptor superfamily, member 25"                               |
| 24          | -0.9131341            | 1.29E-21                                    | CRTAP              | cartilage associated protein                                                          |
| 25          | -0.98072535           | 5.94E-16                                    | INADL              | InaD-like (Drosophila)                                                                |
| 26          | -1.0732092            | 1.17E-15                                    | NKTR               | natural killer-tumor recognition sequence                                             |
| 27          | -1.1038533            | 1.37E-22                                    | ZCCHC14            | "zinc finger, CCHC domain containing 14"                                              |
| 28          | -1.1260724            | 3.84E-16                                    | FCGBP              | Fc fragment of IgG binding protein                                                    |
| 29          | -1.6448973            | 6.09E-25                                    | STXBP5             | syntaxin binding protein 5 (tomosyn)                                                  |
| 30          | -2.427094             | 3.38E-18                                    | FNBP1              | formin binding protein 1                                                              |



**Supplementary Table S3. Genes specific primers.**

| <b>SNO.</b> | <b>GENES</b>   | <b>PRIMERS</b>                                                        |
|-------------|----------------|-----------------------------------------------------------------------|
| 1.          | ATOX1          | FP: 5' CGAGAGACAGCTTCAGCACA 3'<br>RP: 5' GAATCCAGAGAGGGCGCTG 3'       |
| 2.          | OAS2           | FP: 5' TACCATCGGAGTTGCCTCTT 3'<br>RP: 5' CACTGATCGACGAGATGGTG3'       |
| 3.          | USP18          | FP: 5' AACGTGCCCTTGTTTGTCCAA 3'<br>RP: 5' GAGTCCTTCACCCGGATCGTA 3'    |
| 4.          | INADL/PATJ     | FP: 5' GAGTGTAGCAGACAGGGATCA 3'<br>RP: 5' TGCTTTTTTGTGTGGACTGGTT3'    |
| 5.          | CRTAP          | FP: 5' CAGTTATAGGAGGCTATCCGGT 3'<br>RP: 5' TCCCTGTGGTACTGGTAATACAC 3' |
| 6.          | $\beta$ -Actin | FP: 5' CCTTGACATGCCGGAG 3'<br>RP: 5' GCACAGAGCCTCGCCTT 3'             |

**Supplementary Table S4. Pathway enrichment analysis results.**

| <b>PATHWAY</b>                                                                               | <b>P-value</b> | <b>Genes</b> |
|----------------------------------------------------------------------------------------------|----------------|--------------|
| Interferon alpha/beta signalling                                                             | 0.004360249    | OAS2;USP18   |
| Role of second messengers in netrin-1 signalling                                             | 0.016121595    | TRPC1        |
| Synthesis And Processing Of GAG, GAGPOL Polyproteins                                         | 0.017575531    | NMT2         |
| Membrane binding and targeting of GAG proteins                                               | 0.017575531    | NMT2         |
| Synthesis, secretion, and inactivation of Glucose-dependent Insulinotropic Polypeptide (GIP) | 0.020477603    | SPCS3        |
| Assembly Of The HIV Virion                                                                   | 0.020477603    | NMT2         |
| Synthesis, secretion, and deacylation of Ghrelin                                             | 0.026258612    | SPCS3        |
| Synthesis, secretion, and inactivation of Glucagon-like Peptide-1 (GLP-1)                    | 0.030574198    | SPCS3        |
| Interferon Signalling                                                                        | 0.032133839    | OAS2;USP18   |
| Incretin synthesis, secretion, and inactivation                                              | 0.034872562    | SPCS3        |
| Regulation of IFNA signalling                                                                | 0.037728601    | USP18        |
| TRP channels                                                                                 | 0.037728601    | TRPC1        |
| Detoxification of Reactive Oxygen Species                                                    | 0.040577031    | ATOX1        |
| Tight junction interactions                                                                  | 0.044835449    | INADL        |
| Inactivation, recovery and regulation of the phototransduction cascade                       | 0.044835449    | NMT2         |
| The phototransduction cascade                                                                | 0.046251137    | NMT2         |
| Antigen activates B Cell Receptor (BCR) leading to generation of second messengers           | 0.061699539    | TRPC1        |
| Netrin-1 signalling                                                                          | 0.061699539    | TRPC1        |
| XBP1(S) activates chaperone genes                                                            | 0.067261059    | CTDSP2       |
| IRE1alpha activates chaperones                                                               | 0.070030678    | CTDSP2       |
| Cytokine signalling in Immune system                                                         | 0.072777577    | OAS2;USP18   |
| Golgi Associated Vesicle Biogenesis                                                          | 0.078295183    | TGOLN2       |
| Cell-cell junction organization                                                              | 0.086493528    | INADL        |
| trans-Golgi Network Vesicle Budding                                                          | 0.08785352     | TGOLN2       |
| Clathrin derived vesicle budding                                                             | 0.08785352     | TGOLN2       |
| Collagen biosynthesis and modifying enzymes                                                  | 0.091922569    | CRTAP        |
